# Supplementary material for: Spectroscopic Study of the Salicyladazine Derivative–UO22+ Complex and Its Immobilization to Mesoporous Silica
Source: PubMed Central journal article supplement (PMC6566226; doi:10.3390/nano9050688), 2019-05-02
Supplement: nanomaterials-09-00688-s001.pdf [file nanomaterials-09-00688-s001.pdf]

## Supplementary Materials

# Spectroscopic Study of the Salicyladazine Derivative– $\text{UO}_2^{2+}$ Complex and Its Immobilization to Mesoporous Silica

Sujin Park <sup>1</sup>, Jaehyeon Park <sup>1</sup>, Ji Ha Lee <sup>2,\*</sup>, Myong Yong Choi <sup>1,\*</sup> and Jong Hwa Jung <sup>1,\*</sup>

<sup>1</sup> Department of Chemistry and Research Institute of Natural Sciences, Gyeongsang National University, Jinju 52828, Korea; 0165255562@naver.com (S.P.); parkjae@gnu.ac.kr (J.P.)

<sup>2</sup> Department of Chemistry and Biochemistry, The University of Kitakyushu, Hibikino, Kitakyushu 808-0135, Japan

\* Correspondence: l-ji@kitakyu-u.ac.jp (J.H.L.); mychoi@gnu.ac.kr (M.Y.C.); jonghwa@gnu.ac.kr (J.H.J.); Tel.: +82-55-772-1488 (J.H.J.)

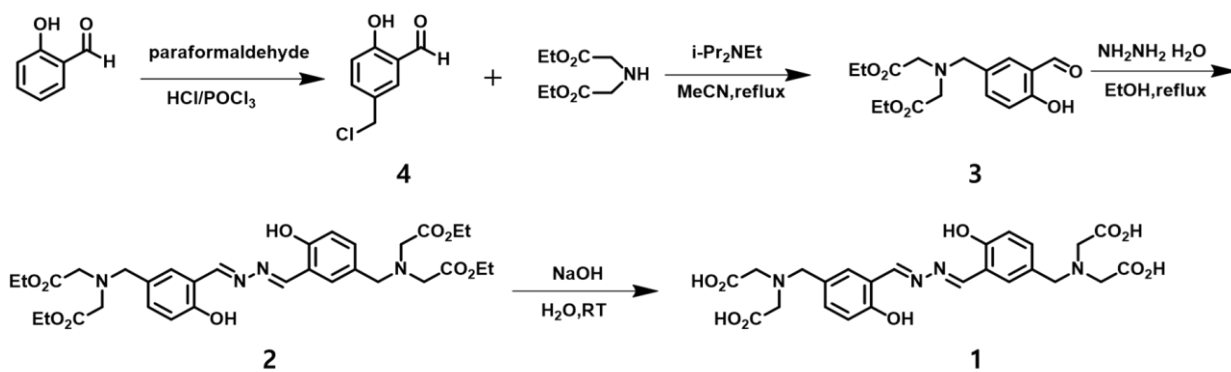

Scheme S1. Synthesis route of compound 1.

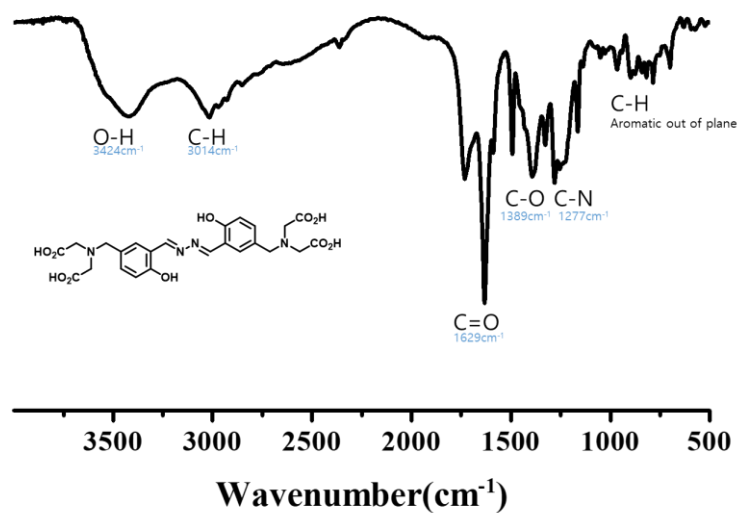

Figure S1. FT-IR spectrum of compound 1.

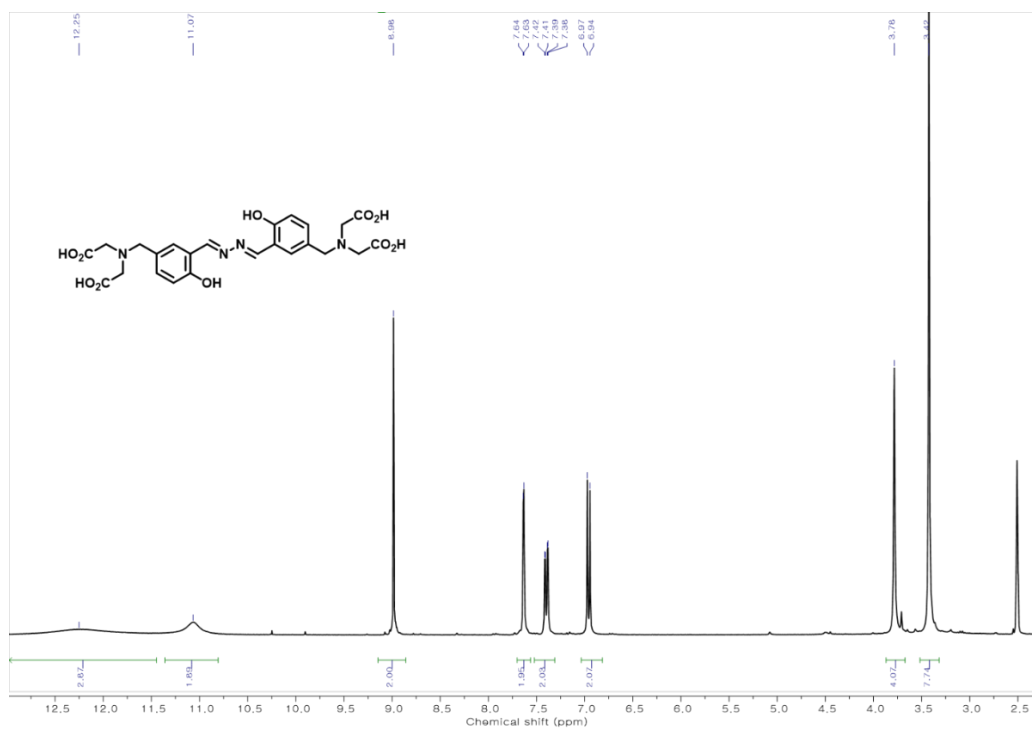

Figure S2. <sup>1</sup>H NMR spectrum of compound 1 in DMSO-d<sub>6</sub>.

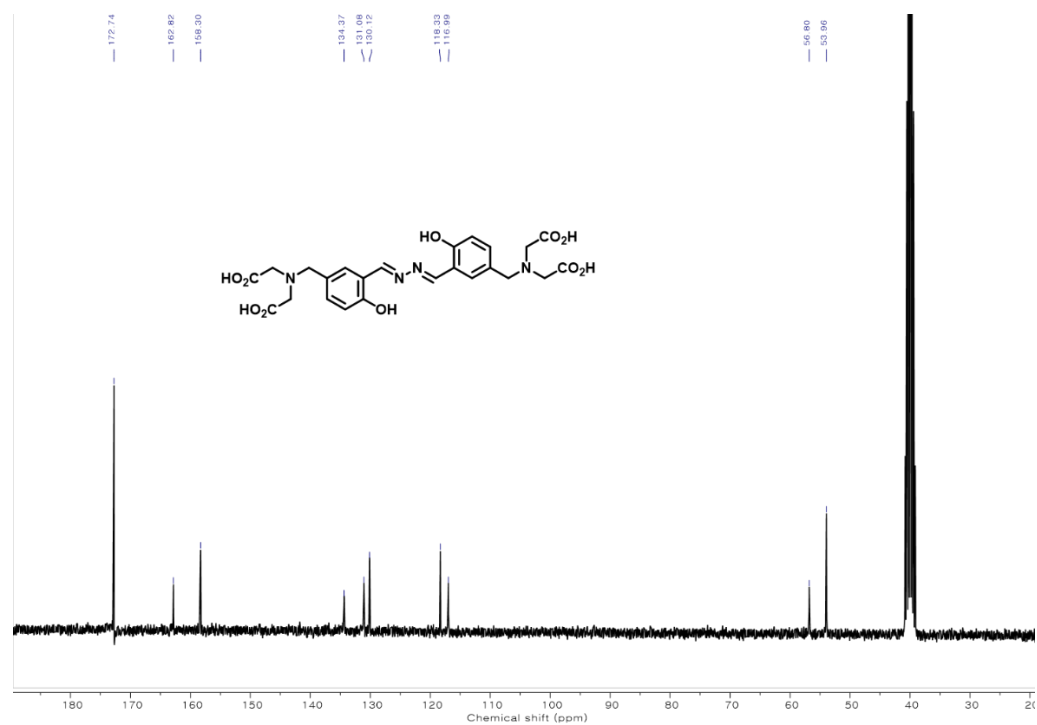

Figure S3. <sup>13</sup>C NMR spectrum of compound 1 in DMSO-d<sub>6</sub>.

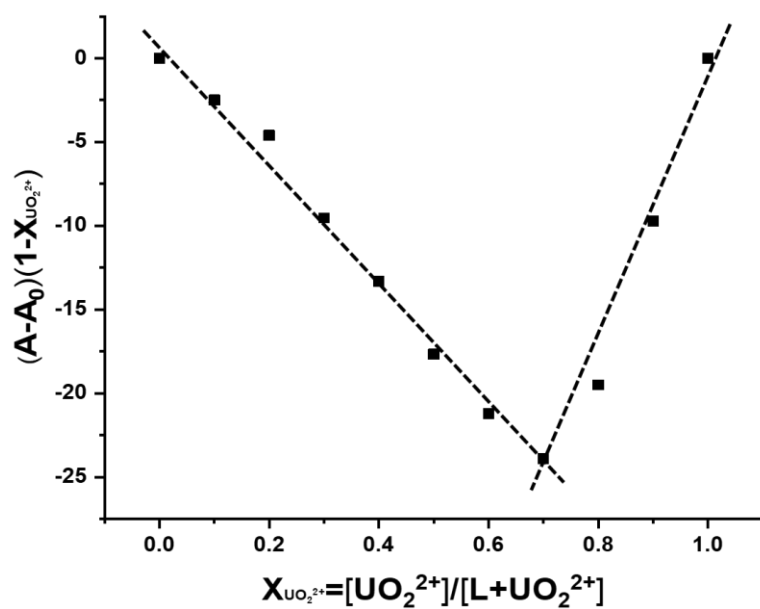

Figure S4. Job's plot for complex formed between compound 1 and  $\text{UO}_2^{2+}$ .

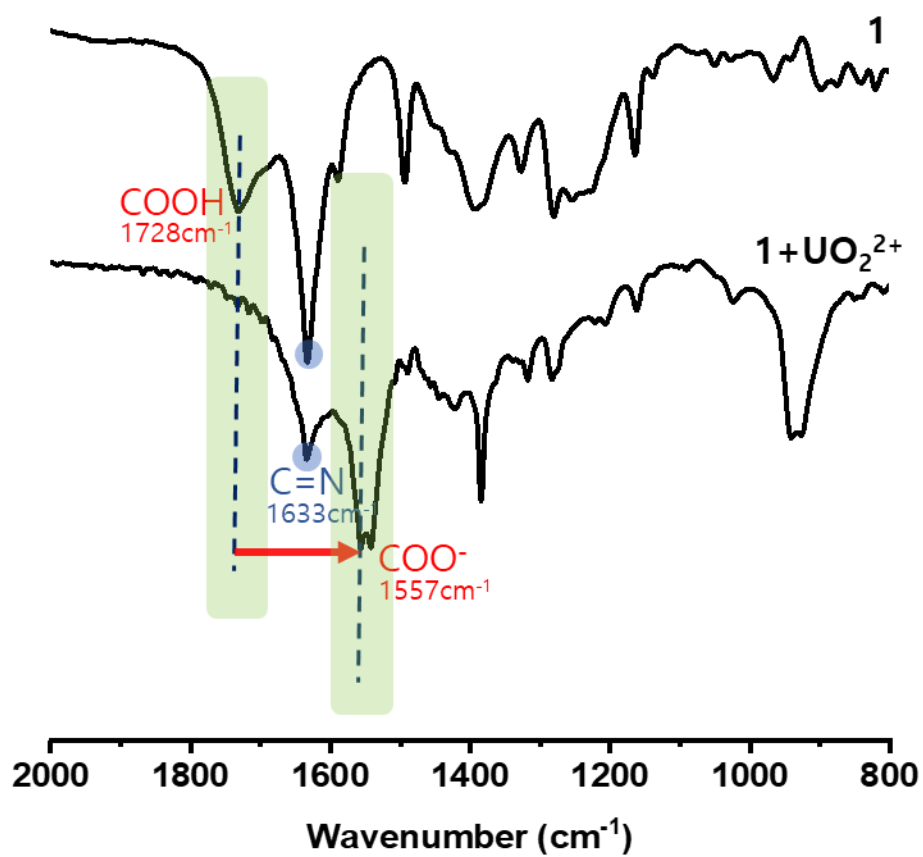

Figure S5. FT-IR spectra of 1 and 1 with  $\text{UO}_2^{2+}$ .

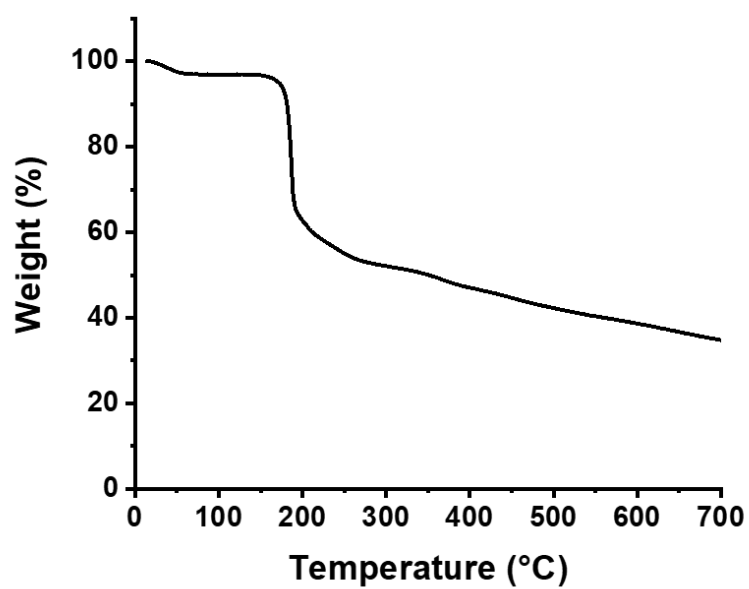

Figure S6. TGA thermogram of compound 1.

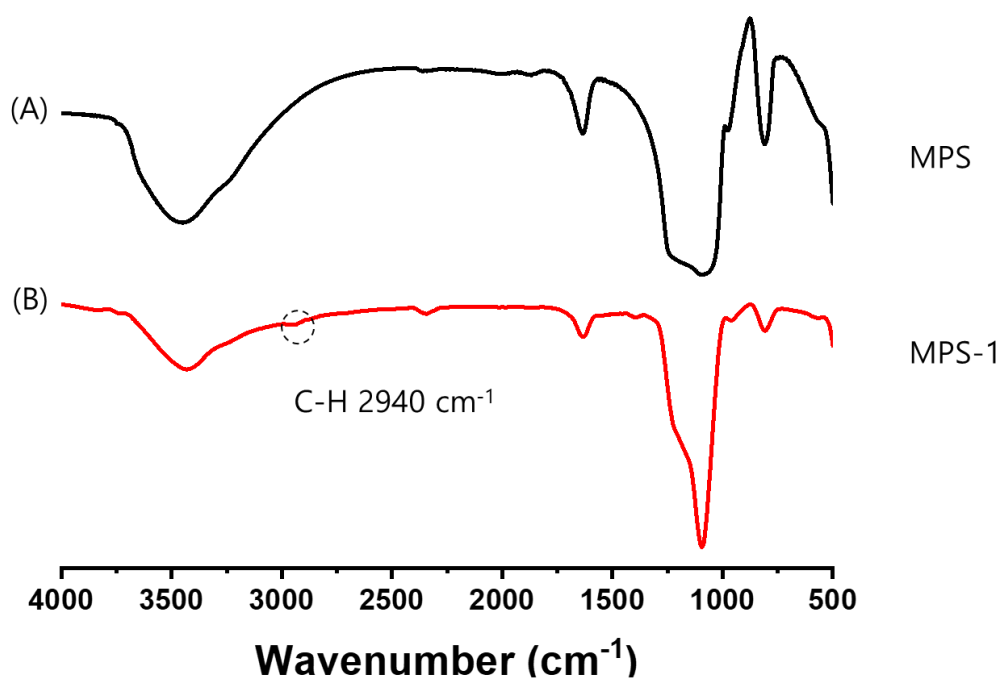

Figure S7. FT-IR spectra of (A) MPS and (B) MPS-1.

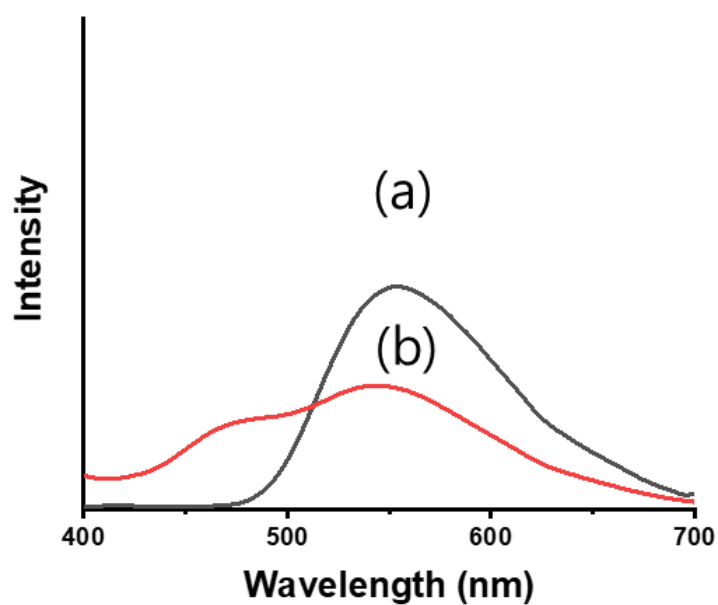

**Figure S8.** Fluorescence spectra of (a) MPS-1 (2 mg) in 3.5% NaCl solution (2 mL) and (b) MPS-1 (2 mg) with  $\text{UO}_2^{2+}$  solution (100 ppb) in 3.5% NaCl (2 mL).

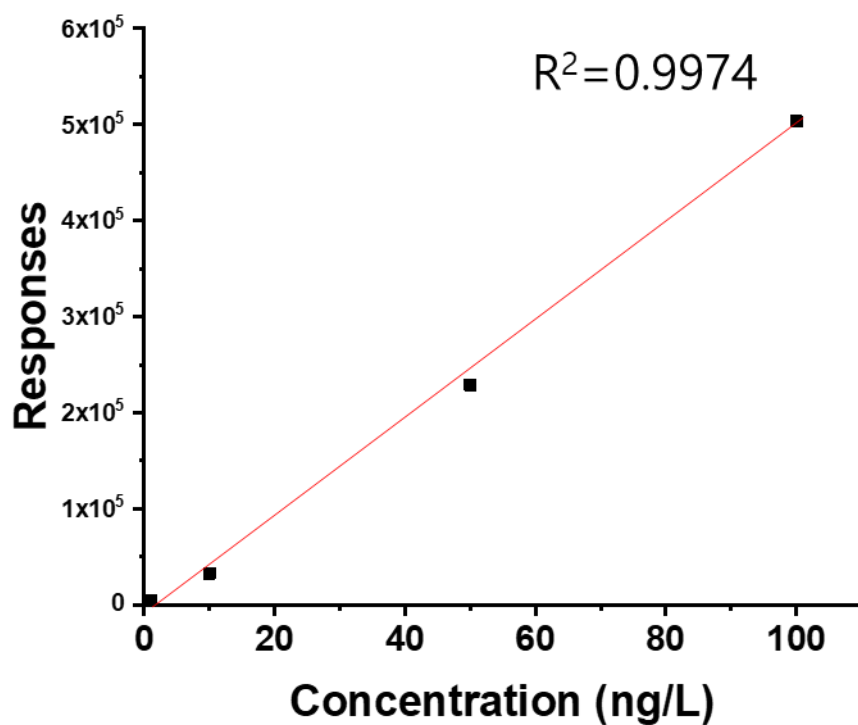

**Figure S9.** Linear equation of various concentrations of  $\text{UO}_2^{2+}$ .

**Table S1.** Adsorption Capacities of **MPS-1** for  $\text{UO}_2^{2+}$  (100 ppb) solution.<sup>a</sup>

| MPS-1 (mg) | Removal of $\text{UO}_2^{2+}$ (%) | SD   | RSD(%) |
|------------|-----------------------------------|------|--------|
| 1          | 69.65                             | 4.14 | 13.64  |
| 3          | 96.28                             | 0.44 | 12.02  |
| 5          | 95.16                             | 0.60 | 12.47  |

  

| MPS (mg) | Removal of $\text{UO}_2^{2+}$ (%) | SD   | RSD(%) |
|----------|-----------------------------------|------|--------|
| 5        | 1.85                              | 0.18 | 9.72   |

<sup>a</sup>SD = standard deviation; RSD = relative standard deviation.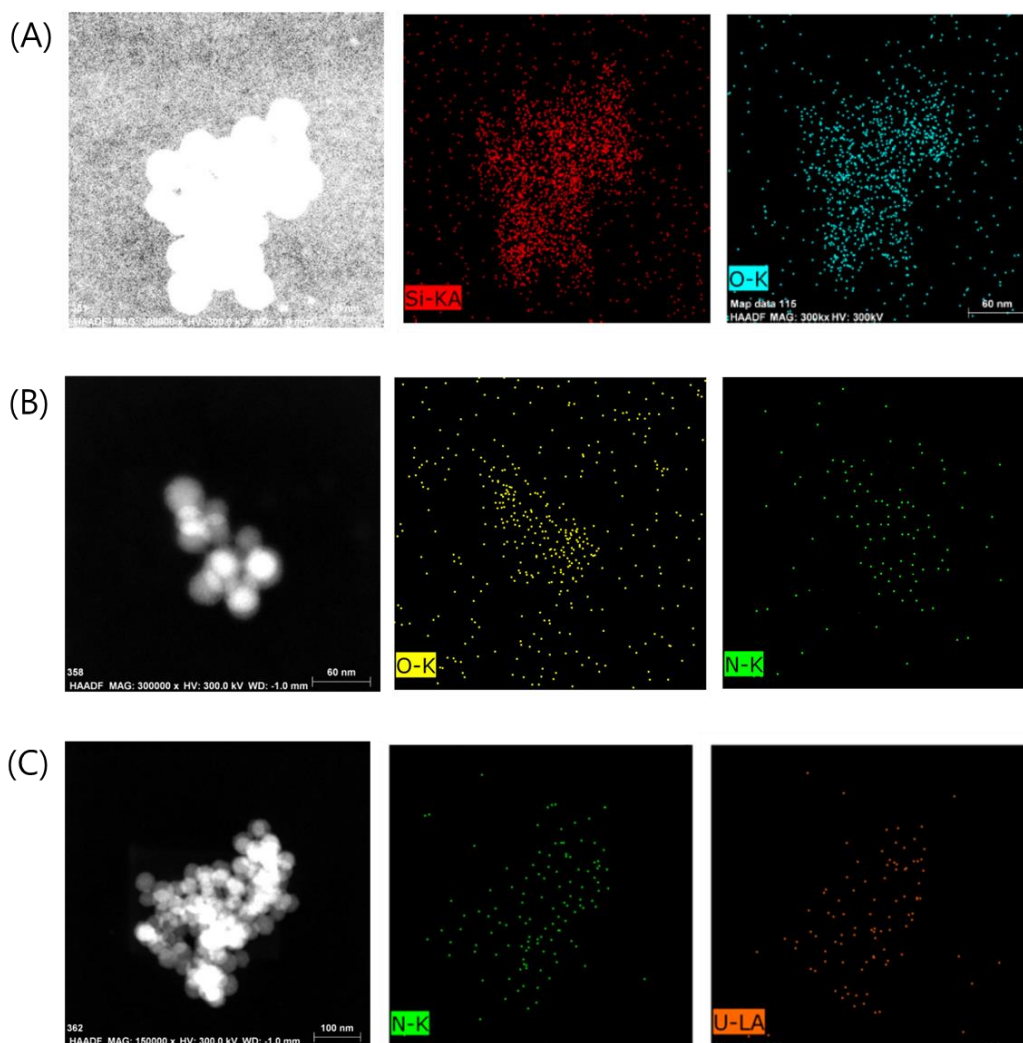**Figure S10.** TEM EDX mapping of (A) **MPS** (B) **MPS-1** and (C) **MPS-1** with  $\text{UO}_2^{2+}$ .**Table S2.** Adsorption Capacities of **MPS-1** (5 mg) with various metal ions (100 ppb) solution.

| Removal of metal ion (%) |               |                  |                  |                  |               |                  |                  |                  |
|--------------------------|---------------|------------------|------------------|------------------|---------------|------------------|------------------|------------------|
| $\text{UO}_2^{2+}$       | $\text{Na}^+$ | $\text{Mg}^{2+}$ | $\text{Ca}^{2+}$ | $\text{Cu}^{2+}$ | $\text{Ag}^+$ | $\text{Ni}^{2+}$ | $\text{Mn}^{2+}$ | $\text{Pb}^{2+}$ |
| 95.26                    | 5.21          | 15.18            | 42.31            | 27.54            | 21.87         | 23.11            | 17.59            | 26.62            |
